# Supplementary material for: pH-Responsive prodrug nanoparticles based on a sodium alginate derivative for selective co-release of doxorubicin and curcumin into tumor cells
Source: Royal Society of Chemistry journal article supplement (doi:10.1039/c7nr03611f), 2017-01-01
Supplement: c7nr03611f1.pdf [file c7nr03611f1.pdf]

## Supplementary information

### pH-responsive prodrug nanoparticles based on a sodium alginate derivative for selective co-release of doxorubicin and curcumin in tumor cells

Cheng Gao,<sup>a</sup> Fan Tang,<sup>a</sup> Guiyi Gong,<sup>a</sup> Jianxiang Zhang,<sup>b</sup> Maggie P.M. Hoi,<sup>a</sup> Simon M.Y. Lee<sup>a,\*</sup> and Ruibing Wang<sup>a,\*</sup>

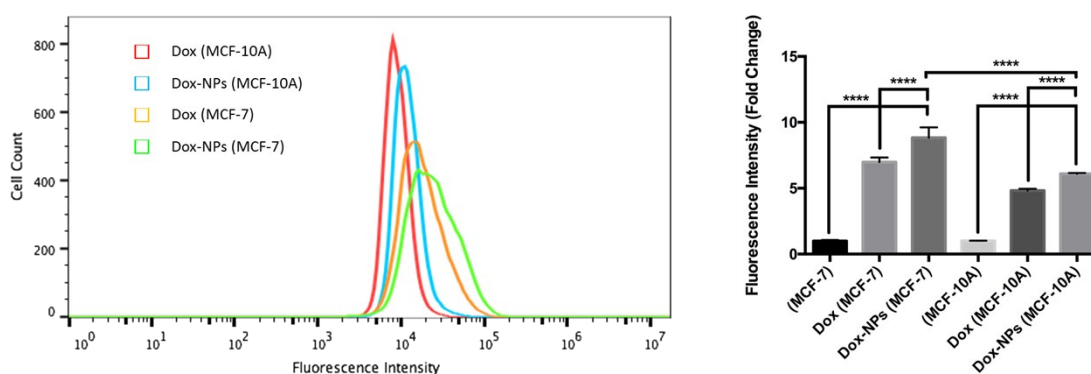

**Figure S1.** Intracellular Dox fluorescence intensity measured by flow cytometry after the cells were incubated with the Dox or Dox-NPs for 8 h. \*\*\*\* $P < 0.0001$ .

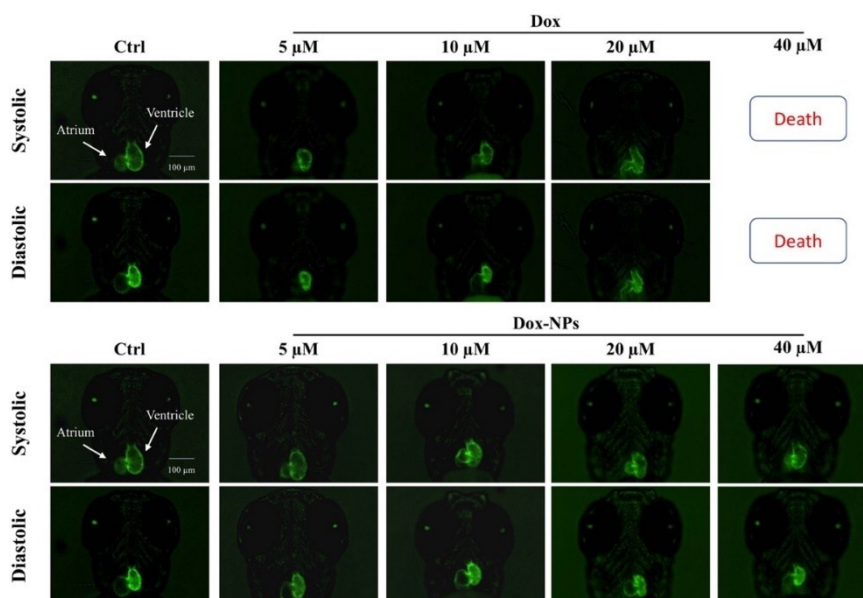

**Figure S2.** Representative fluorescent images of the zebrafish hearts exposed to various concentrations of free Dox and Dox-NPs for 2 days.
